# Supplementary material for: The Role of Free-Living Daily Walking in Human Weight Gain and Obesity
Source: Oxford University Press journal article supplement (doi:10.2337/db07-0815), 2007-11-15
Supplement: db07-0815onlineappendixtable.doc [file db07-0815onlineappendixtable.doc]

|  | Baseline |  |  | Over-fed |  |  |
| --- | --- | --- | --- | --- | --- | --- |
| Subject | Walk time (min/day) | mean time per walk (min) | Walks/day | Walk time (min/day) | mean time per walk (min) | Walks/day |
| 1 | 471 | 9 | 52 | 472 | 9 | 54 |
| 2 | 574 | 14 | 42 | 692 | 15 | 46 |
| 3 | 260 | 7 | 39 | 289 | 8 | 34 |
| 4 | 291 | 7 | 38 | 293 | 9 | 31 |
| 5 | 504 | 10 | 50 | 486 | 8 | 59 |
| 6 | 547 | 11 | 48 | 524 | 10 | 51 |
| 7 | 511 | 11 | 45 | 504 | 10 | 48 |
| 8 | 456 | 7 | 62 | 459 | 7 | 66 |
| 9 | 526 | 15 | 36 | 497 | 12 | 41 |
| 10 | 338 | 7 | 52 | 369 | 8 | 47 |
| 11 | 286 | 6 | 50 | 308 | 5 | 61 |
| 12 | 223 | 5 | 48 | 230 | 5 | 43 |
| 13 | 343 | 8 | 40 | 274 | 6 | 44 |
| 14 | 412 | 7 | 58 | 377 | 7 | 53 |
| 15 | 380 | 8 | 48 | 433 | 7 | 59 |
| 16 | 335 | 14 | 48 | 381 | 7 | 52 |
| 17 | 355 | 7 | 49 | 321 | 7 | 47 |
| 18 | 236 | 6 | 40 | 226 | 6 | 36 |
| 19 | 306 | 7 | 46 | 244 | 6 | 42 |
| 20 | 378 | 8 | 46 | 454 | 13 | 36 |
| 21 | 493 | 12 | 43 | 411 | 11 | 38 |
| 22 | 323 | 6 | 53 | 350 | 6 | 56 |
